# Supplementary material
Source: PubMed Central journal article supplement (PMC7104659)
Supplement: NIHMS1569872-supplement-Supplementary_material.pdf [file NIHMS1569872-supplement-Supplementary_material.pdf]

High Pressure Processing of Broccoli Sprouts - Influence on Bioactivation of Glucosinolates to Isothiocyanates

Anna Westphal<sup>1</sup> · Kenneth M. Riedl<sup>2</sup> · Jessica L. Cooperstone<sup>2</sup> · Shreya Kamat<sup>2</sup> · V. M. Balasubramaniam<sup>2</sup> · Steven J. Schwartz<sup>2</sup> · Volker Böhm<sup>1\*</sup>

<sup>1</sup> Institute of Nutrition, Friedrich Schiller University Jena, Dornburger Straße 25–29, 07743 Jena, Germany

<sup>2</sup> Department of Food Science and Technology, Ohio State University, 2015 Fyffe Road, 110 Parker Food Science and Technology Bldg., Columbus, OH 43210, USA

Corresponding author:

\* Corresponding author. Tel.: +49 3641 949633; fax: +49 3641 949702. E-mail address: volker.boehm@uni-jena.de (V. Böhm).

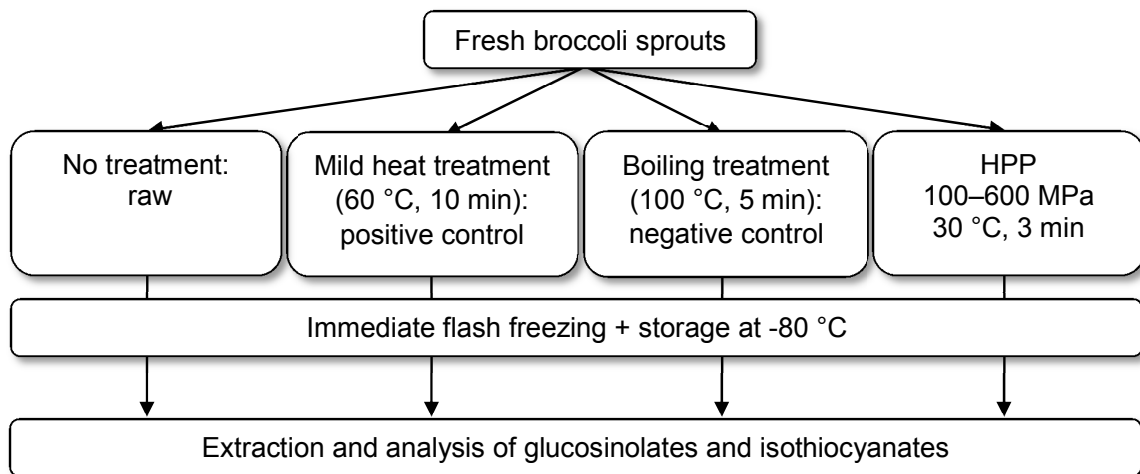

**Supporting Figure 1** Schematic procedure of the broccoli sprouts processing.
